# Supplementary material for: Neutrophil-to-Lymphocyte Ratio (NLR) Predicts PD-1 Inhibitor Survival in Patients with Metastatic Gastric Cancer
Source: Hindawi journal article supplement (doi:10.1155/2021/2549295), 2021-12-28
Supplement: f1 [file 2549295.f1.pdf]

| ID号      | No | gender | age_ | PD-L1 | ECOGPS | tumorlocation | differentiation | surgery |
|----------|----|--------|------|-------|--------|---------------|-----------------|---------|
| Y4153712 | 1  | 1      | 1    | 1     | 1      | 1             | 2               | 0       |
| Y4435846 | 2  | 1      | 2    | 1     | 0      | 2             | 2               | 1       |
| Y4481284 | 3  | 2      | 1    | 1     | 0      | 2             | 2               | 0       |
| Y4559338 | 4  | 1      | 2    | 1     | 1      | 1             | 2               | 0       |
| Y4576508 | 5  | 2      | 2    | 1     | 0      | 2             | 1               | 1       |
| Y4820332 | 6  | 1      | 2    | 2     | 1      | 2             | 2               | 0       |
| C505264  | 7  | 2      | 1    | 0     | 0      | 2             | 1               | 0       |
| Y3282094 | 8  | 1      | 1    | 0     | 0      | 2             | 2               | 0       |
| Y3302155 | 9  | 2      | 2    | 0     | 1      | 1             | 1               | 1       |
| Y3471088 | 10 | 1      | 2    | 0     | 0      | 2             | 2               | 0       |
| Y4154876 | 11 | 1      | 1    | 1     | 0      | 1             | 1               | 1       |
| Y3231147 | 12 | 2      | 2    | 0     | 2      | 2             | 1               | 0       |
| Y4377401 | 13 | 1      | 2    | 0     | 0      | 2             | 3               | 0       |
| Y4392907 | 14 | 1      | 1    | 0     | 0      | 1             | 2               | 0       |
| Y4350595 | 15 | 1      | 2    | 0     | 1      | 1             | 2               | 0       |
| Y4568691 | 16 | 1      | 2    | 0     | 0      | 2             | 1               | 0       |
| Y4629919 | 17 | 1      | 1    | 0     | 0      | 3             | 1               | 1       |
| Y4670963 | 18 | 1      | 1    | 0     | 0      | 2             | 1               | 0       |
| Y3633294 | 19 | 1      | 1    | 2     | 0      | 2             | 1               | 0       |
| D667609  | 20 | 2      | 2    | 2     | 0      | 1             | 1               | 0       |
| Y4906726 | 21 | 1      | 2    | 1     | 1      | 2             | 2               | 0       |
| Y5071634 | 22 | 2      | 2    | 0     | 1      | 2             | 1               | 0       |
| Y3247995 | 23 | 1      | 1    | 2     | 0      | 2             | 1               | 1       |
| Y1292640 | 24 | 1      | 2    | 0     | 0      | 2             | 1               | 1       |
| C505264  | 25 | 2      | 1    | 0     | 1      | 3             | 1               | 0       |
| K0128391 | 26 | 1      | 2    | 0     | 1      | 1             | 2               | 0       |
| Y0988778 | 27 | 1      | 2    | 0     | 1      | 2             | 1               | 0       |
| Y1558948 | 28 | 1      | 1    | 0     | 2      | 2             | 1               | 1       |
| Y1728276 | 29 | 1      | 2    | 0     | 1      | 1             | 2               | 1       |
| Y2438545 | 30 | 1      | 1    | 0     | 1      | 2             | 2               | 1       |
| Y3164696 | 31 | 1      | 2    | 0     | 1      | 1             | 1               | 0       |
| Y3420112 | 32 | 1      | 1    | 0     | 1      | 1             | 2               | 0       |
| Y3645123 | 33 | 1      | 2    | 0     | 1      | 2             | 2               | 0       |
| Y3789342 | 34 | 1      | 1    | 1     | 0      | 2             | 1               | 1       |
| Y4442529 | 35 | 2      | 2    | 2     | 1      | 2             | 1               | 0       |
| Y5137137 | 36 | 1      | 1    | 0     | 0      | 2             | 2               | 1       |
| Y5080793 | 37 | 1      | 2    | 0     | 0      | 1             | 1               | 0       |
| Y5167189 | 38 | 2      | 2    | 2     | 1      | 2             | 1               | 0       |
| Y5089548 | 39 | 1      | 2    | 0     | 1      | 2             | 2               | 0       |
| Y5055713 | 40 | 1      | 1    | 2     | 1      | 2             | 1               | 1       |
| Y5287197 | 41 | 1      | 2    | 1     | 1      | 1             | 3               | 1       |
| Y2980577 | 42 | 2      | 1    | 0     | 0      | 2             | 2               | 1       |
| Y4488463 | 43 | 2      | 2    | 1     | 1      | 2             | 2               | 0       |
| Y2261019 | 44 | 1      | 1    | 0     | 1      | 2             | 1               | 0       |
| Y5025214 | 45 | 1      | 2    | 0     | 1      | 1             | 1               | 0       |
| Y5191789 | 46 | 2      | 1    | 0     | 1      | 2             | 1               | 1       |
| Y2481785 | 47 | 1      | 2    | 0     | 1      | 2             | 2               | 0       |
| Y5007203 | 48 | 1      | 1    | 1     | 1      | 3             | 2               | 1       |
| Y4809653 | 49 | 2      | 1    | 2     | 1      | 2             | 1               | 1       |
| Y4645808 | 50 | 1      | 2    | 0     | 1      | 1             | 2               | 1       |
| C505264  | 51 | 2      | 1    | 0     | 1      | 2             | 1               | 0       |
| Y1327321 | 52 | 1      | 1    | 0     | 1      | 2             | 2               | 1       |

|          |     |   |   |   |   |   |   |   |
|----------|-----|---|---|---|---|---|---|---|
| D667609  | 53  | 2 | 2 | 2 | 0 | 1 | 1 | 0 |
| C092864  | 54  | 2 | 2 | 2 | 2 | 1 | 2 | 1 |
| C505264  | 55  | 2 | 1 | 0 | 1 | 3 | 1 | 0 |
| Y0988778 | 56  | 1 | 2 | 0 | 1 | 2 | 1 | 0 |
| Y3645123 | 57  | 1 | 2 | 1 | 2 | 2 | 2 | 0 |
| Y2481785 | 58  | 1 | 2 | 0 | 1 | 2 | 3 | 1 |
| C505264  | 59  | 2 | 1 | 0 | 1 | 2 | 1 | 0 |
| Y1327321 | 60  | 1 | 1 | 0 | 1 | 2 | 2 | 1 |
| D667609  | 61  | 2 | 2 | 2 | 0 | 1 | 1 | 0 |
| C092864  | 62  | 2 | 2 | 2 | 2 | 1 | 2 | 1 |
| C505264  | 63  | 2 | 1 | 0 | 1 | 3 | 1 | 0 |
| Y0988778 | 64  | 1 | 2 | 0 | 1 | 2 | 1 | 0 |
| Y3645123 | 65  | 1 | 2 | 1 | 2 | 2 | 2 | 0 |
| Y2481785 | 66  | 1 | 2 | 0 | 1 | 2 | 2 | 1 |
| Y1578750 | 67  | 1 | 2 | 0 | 2 | 2 | 2 | 0 |
| A634551  | 68  | 2 | 2 | 0 | 1 | 2 | 1 | 1 |
| K0185545 | 69  | 2 | 1 | 0 | 1 | 2 | 1 | 0 |
| Y3196519 | 70  | 2 | 1 | 1 | 1 | 2 | 1 | 0 |
| G165207  | 71  | 1 | 2 | 2 | 1 | 2 | 1 | 0 |
| Y1963392 | 72  | 1 | 2 | 0 | 1 | 1 | 2 | 1 |
| G158017  | 73  | 1 | 2 | 2 | 1 | 1 | 1 | 0 |
| Y3708514 | 74  | 1 | 2 | 0 | 2 | 1 | 2 | 0 |
| Y3772555 | 75  | 1 | 2 | 2 | 1 | 2 | 2 | 1 |
| Y2077294 | 76  | 1 | 2 | 2 | 1 | 2 | 3 | 0 |
| A239481  | 77  | 1 | 1 | 0 | 1 | 2 | 2 | 0 |
| A286541  | 78  | 1 | 1 | 1 | 1 | 2 | 2 | 1 |
| Y3908399 | 79  | 1 | 2 | 1 | 0 | 1 | 1 | 0 |
| F994337  | 80  | 2 | 1 | 2 | 0 | 2 | 1 | 1 |
| A831257  | 81  | 1 | 1 | 0 | 1 | 2 | 2 | 1 |
| 826185   | 82  | 2 | 1 | 0 | 1 | 2 | 1 | 1 |
| G183433  | 83  | 1 | 2 | 1 | 0 | 3 | 2 | 1 |
| Y4339684 | 84  | 1 | 1 | 0 | 1 | 2 | 1 | 1 |
| K0469715 | 85  | 1 | 2 | 0 | 1 | 2 | 3 | 0 |
| Y4484338 | 86  | 1 | 1 | 0 | 1 | 3 | 2 | 1 |
| G158867  | 87  | 1 | 2 | 0 | 1 | 2 | 1 | 1 |
| Y4358337 | 88  | 1 | 1 | 0 | 1 | 2 | 2 | 0 |
| Y4903087 | 89  | 2 | 2 | 2 | 0 | 2 | 1 | 0 |
| Y4597829 | 90  | 2 | 1 | 0 | 1 | 2 | 1 | 1 |
| 368492   | 91  | 1 | 2 | 2 | 2 | 2 | 1 | 1 |
| C132938  | 92  | 1 | 2 | 0 | 1 | 1 | 2 | 1 |
| D111198  | 93  | 1 | 1 | 2 | 1 | 2 | 1 | 1 |
| F918783  | 94  | 2 | 1 | 1 | 1 | 2 | 1 | 0 |
| F994337  | 95  | 1 | 1 | 2 | 2 | 2 | 1 | 0 |
| G108758  | 96  | 1 | 1 | 0 | 1 | 1 | 1 | 0 |
| G131031  | 97  | 1 | 1 | 0 | 1 | 2 | 1 | 1 |
| K0119532 | 98  | 1 | 2 | 2 | 1 | 2 | 2 | 1 |
| K0168554 | 99  | 1 | 2 | 0 | 1 | 2 | 2 | 1 |
| Y1045594 | 100 | 1 | 1 | 2 | 1 | 2 | 2 | 0 |
| Y1053455 | 101 | 1 | 2 | 0 | 1 | 2 | 2 | 1 |
| Y1236445 | 102 | 1 | 2 | 1 | 1 | 2 | 1 | 1 |
| Y1309204 | 103 | 1 | 1 | 0 | 1 | 1 | 1 | 1 |
| Y1327321 | 104 | 1 | 1 | 0 | 1 | 3 | 2 | 1 |
| Y1737537 | 105 | 2 | 1 | 2 | 1 | 2 | 1 | 1 |
| Y1963392 | 106 | 1 | 2 | 0 | 0 | 1 | 2 | 1 |

|          |     |   |   |   |   |   |   |   |
|----------|-----|---|---|---|---|---|---|---|
| Y2033553 | 107 | 2 | 2 | 0 | 0 | 2 | 2 | 1 |
| Y2090079 | 108 | 2 | 2 | 0 | 1 | 1 | 1 | 0 |
| Y2305132 | 109 | 1 | 1 | 0 | 1 | 3 | 1 | 1 |
| Y2414804 | 110 | 1 | 2 | 0 | 1 | 2 | 2 | 1 |
| Y3196519 | 111 | 2 | 1 | 1 | 2 | 2 | 1 | 0 |
| Y3654953 | 112 | 1 | 1 | 0 | 1 | 2 | 2 | 0 |
| Y3708514 | 113 | 1 | 2 | 0 | 2 | 1 | 3 | 0 |
| Y3924085 | 114 | 1 | 2 | 0 | 0 | 3 | 2 | 0 |
| Y3981457 | 115 | 1 | 1 | 0 | 1 | 2 | 1 | 0 |
| Y4792631 | 116 | 1 | 1 | 1 | 1 | 2 | 2 | 0 |
| Y4143354 | 117 | 2 | 2 | 0 | 1 | 1 | 1 | 0 |
| Y3259172 | 118 | 2 | 2 | 1 | 1 | 2 | 2 | 1 |
| Y5051317 | 119 | 1 | 2 | 1 | 0 | 1 | 2 | 0 |
| Y1631605 | 120 | 1 | 2 | 0 | 1 | 2 | 2 | 1 |
| Y4272931 | 121 | 1 | 1 | 0 | 1 | 1 | 1 | 1 |
| K0144083 | 122 | 1 | 2 | 0 | 2 | 2 | 2 | 1 |
| Y0634724 | 123 | 1 | 2 | 0 | 0 | 2 | 1 | 1 |
| Y4576508 | 124 | 2 | 2 | 1 | 0 | 2 | 1 | 1 |
| Y4629919 | 125 | 1 | 1 | 0 | 0 | 3 | 1 | 1 |
| D667609  | 126 | 2 | 2 | 2 | 0 | 1 | 1 | 0 |
| K0025599 | 127 | 1 | 2 | 0 | 1 | 1 | 1 | 0 |
| Y3424448 | 128 | 1 | 2 | 2 | 1 | 2 | 1 | 0 |
| C132938  | 129 | 1 | 2 | 0 | 0 | 1 | 2 | 1 |
| Y1963392 | 130 | 1 | 2 | 0 | 1 | 1 | 2 | 1 |
| K0025599 | 131 | 1 | 2 | 0 | 1 | 1 | 1 | 0 |
| Y3424448 | 132 | 1 | 2 | 2 | 1 | 2 | 1 | 0 |
| C132938  | 133 | 1 | 2 | 0 | 0 | 1 | 2 | 1 |
| Y3478094 | 134 | 1 | 2 | 1 | 1 | 2 | 1 | 1 |
| F586365  | 135 | 1 | 2 | 2 | 2 | 2 | 2 | 1 |
| F994337  | 136 | 2 | 1 | 2 | 2 | 2 | 1 | 1 |
| Y1963392 | 137 | 1 | 2 | 0 | 1 | 1 | 2 | 1 |

| numberofM2 | livermeta | smokinghistory | drinkinghistory | Line | atment_t | wbc   | N      |
|------------|-----------|----------------|-----------------|------|----------|-------|--------|
| 2          | 0         | 1              | 1               | 1    | 1        | 4.25  | 0.738  |
| 2          | 0         | 1              | 1               | 1    | 2        | 6.25  | 0.76   |
| 2          | 1         | 0              | 0               | 1    | 1        | 2.12  | 0.65   |
| 2          | 1         | 1              | 1               | 1    | 1        | 8.65  | 0.676  |
| 2          | 0         | 0              | 0               | 1    | 1        | 9.84  | 0.792  |
| 2          | 1         | 0              | 1               | 1    | 1        | 5.22  | 0.607  |
| 2          | 0         | 0              | 0               | 1    | 1        | 4.04  | 0.665  |
| 2          | 1         | 1              | 1               | 1    | 1        | 5.29  | 0.511  |
| 2          | 0         | 1              | 0               | 1    | 1        | 5.44  | 0.672  |
| 2          | 1         | 0              | 0               | 1    | 1        | 5.84  | 0.677  |
| 1          | 0         | 1              | 1               | 1    | 1        | 5.1   | 0.624  |
| 2          | 0         | 0              | 0               | 1    | 1        | 2.17  | 0.457  |
| 2          | 1         | 1              | 1               | 1    | 1        | 5.6   | 0.592  |
| 2          | 1         | 0              | 0               | 1    | 1        | 10.17 | 0.688  |
| 2          | 1         | 0              | 1               | 1    | 1        | 5.35  | 0.64   |
| 2          | 1         | 1              | 1               | 1    | 1        | 5.33  | 0.692  |
| 2          | 0         | 0              | 0               | 1    | 1        | 5.26  | 0.629  |
| 2          | 1         | 0              | 0               | 1    | 1        | 10.17 | 0.796  |
| 2          | 0         | 0              | 0               | 1    | 1        | 6.41  | 0.713  |
| 2          | 1         | 0              | 0               | 1    | 1        | 6.87  | 0.734  |
| 2          | 1         | 1              | 1               | 1    | 1        | 5.39  | 0.623  |
| 2          | 0         | 0              | 0               | 1    | 2        | 5.15  | 0.747  |
| 1          | 0         | 1              | 1               | 1    | 1        | 4.16  | 0.688  |
| 2          | 0         | 0              | 0               | 1    | 1        | 4.69  | 0.419  |
| 2          | 0         | 0              | 0               | 1    | 1        | 5.91  | 0.665  |
| 2          | 1         | 1              | 1               | 1    | 2        | 7.04  | 0.688  |
| 2          | 0         | 1              | 1               | 1    | 1        | 5.95  | 0.716  |
| 2          | 1         | 1              | 1               | 1    | 1        | 4.15  | 0.643  |
| 2          | 0         | 1              | 1               | 0    | 2        | 3.45  | 0.77   |
| 1          | 0         | 1              | 1               | 1    | 1        | 4.15  | 0.619  |
| 2          | 1         | 1              | 1               | 1    | 1        | 4.56  | 0.648  |
| 2          | 0         | 1              | 1               | 1    | 1        | 3.39  | 0.643  |
| 2          | 1         | 1              | 1               | 1    | 1        | 6.71  | 0.851  |
| 2          | 1         | 1              | 1               | 1    | 1        | 5.02  | 0.391  |
| 2          | 0         | 0              | 0               | 1    | 1        | 4.44  | 0.623  |
| 1          | 1         | 1              | 1               | 1    | 1        | 5.3   | 0.448  |
| 1          | 1         | 1              | 1               | 1    | 1        | 7.16  | 0.589  |
| 1          | 1         | 0              | 0               | 1    | 1        | 8.14  | 0.7088 |
| 2          | 1         | 0              | 0               | 1    | 1        | 6.65  | 0.732  |
| 1          | 1         | 0              | 0               | 1    | 1        | 7.73  | 0.694  |
| 1          | 1         | 0              | 0               | 1    | 1        | 3.93  | 0.456  |
| 2          | 0         | 0              | 0               | 1    | 1        | 9.45  | 0.668  |
| 1          | 1         | 0              | 0               | 1    | 1        | 4.38  | 0.736  |
| 2          | 0         | 0              | 0               | 1    | 1        | 4.23  | 0.645  |
| 1          | 0         | 0              | 0               | 1    | 1        | 7.1   | 0.673  |
| 1          | 0         | 0              | 0               | 1    | 1        | 4.5   | 0.83   |
| 1          | 0         | 0              | 0               | 1    | 1        | 6.43  | 0.592  |
| 1          | 0         | 1              | 1               | 1    | 1        | 5.2   | 0.703  |
| 2          | 0         | 0              | 0               | 1    | 1        | 3.02  | 0.464  |
| 1          | 0         | 0              | 0               | 1    | 1        | 10.53 | 0.603  |
| 2          | 0         | 0              | 0               | 1    | 1        | 5.91  | 0.665  |
| 1          | 1         | 0              | 0               | 1    | 1        | 4.52  | 0.639  |

|   |   |   |   |   |   |       |       |
|---|---|---|---|---|---|-------|-------|
| 2 | 1 | 0 | 0 | 1 | 1 | 6.87  | 0.805 |
| 1 | 0 | 0 | 0 | 1 | 1 | 3.83  | 0.509 |
| 2 | 0 | 0 | 0 | 1 | 1 | 5.91  | 0.9   |
| 2 | 0 | 1 | 0 | 1 | 1 | 5.95  | 0.717 |
| 2 | 1 | 1 | 1 | 1 | 1 | 6.71  | 0.571 |
| 2 | 0 | 0 | 0 | 1 | 1 | 6.43  | 0.592 |
| 2 | 0 | 0 | 0 | 1 | 1 | 5.91  | 0.665 |
| 1 | 1 | 0 | 0 | 1 | 1 | 4.52  | 0.639 |
| 2 | 1 | 0 | 0 | 1 | 1 | 6.87  | 0.805 |
| 1 | 0 | 0 | 0 | 1 | 1 | 3.83  | 0.509 |
| 2 | 0 | 0 | 0 | 1 | 1 | 5.91  | 0.9   |
| 2 | 0 | 1 | 0 | 1 | 1 | 5.95  | 0.717 |
| 2 | 1 | 1 | 1 | 1 | 1 | 6.71  | 0.571 |
| 2 | 0 | 0 | 0 | 1 | 1 | 6.43  | 0.592 |
| 1 | 1 | 1 | 1 | 0 | 2 | 4.27  | 0.627 |
| 2 | 0 | 0 | 0 | 0 | 2 | 14.04 | 0.806 |
| 1 | 0 | 0 | 0 | 0 | 2 | 4.57  | 0.767 |
| 2 | 0 | 0 | 0 | 0 | 2 | 5.62  | 0.819 |
| 1 | 1 | 1 | 1 | 0 | 2 | 4.14  | 0.721 |
| 2 | 0 | 0 | 0 | 0 | 2 | 7.98  | 0.655 |
| 2 | 1 | 0 | 0 | 0 | 2 | 3.03  | 0.719 |
| 2 | 1 | 0 | 0 | 0 | 2 | 4.03  | 0.948 |
| 2 | 1 | 1 | 1 | 1 | 2 | 3.79  | 0.637 |
| 2 | 0 | 0 | 0 | 0 | 2 | 4.97  | 0.707 |
| 1 | 1 | 1 | 1 | 1 | 2 | 5.76  | 0.6   |
| 2 | 1 | 0 | 0 | 0 | 2 | 5.1   | 0.793 |
| 1 | 1 | 1 | 1 | 1 | 2 | 6.34  | 0.574 |
| 2 | 0 | 1 | 1 | 1 | 2 | 2.76  | 0.488 |
| 2 | 0 | 0 | 0 | 0 | 2 | 4.72  | 0.684 |
| 2 | 0 | 0 | 0 | 0 | 2 | 5.3   | 0.558 |
| 2 | 0 | 0 | 0 | 1 | 2 | 3.25  | 0.616 |
| 1 | 1 | 0 | 0 | 1 | 2 | 3.12  | 0.376 |
| 2 | 1 | 1 | 1 | 0 | 2 | 5.28  | 0.704 |
| 2 | 0 | 0 | 0 | 1 | 2 | 4.31  | 0.708 |
| 2 | 0 | 0 | 0 | 1 | 2 | 6.01  | 0.67  |
| 2 | 0 | 0 | 0 | 1 | 2 | 5.4   | 0.66  |
| 1 | 0 | 0 | 0 | 0 | 2 | 3.98  | 0.452 |
| 2 | 0 | 0 | 0 | 1 | 2 | 4.66  | 0.9   |
| 2 | 0 | 1 | 1 | 0 | 2 | 3.48  | 0.496 |
| 2 | 1 | 1 | 1 | 1 | 2 | 6.37  | 0.731 |
| 1 | 0 | 1 | 1 | 1 | 2 | 10.67 | 0.72  |
| 2 | 0 | 0 | 0 | 0 | 2 | 6.32  | 0.884 |
| 2 | 0 | 0 | 0 | 0 | 2 | 2.76  | 0.488 |
| 2 | 0 | 1 | 1 | 1 | 2 | 5.04  | 0.736 |
| 2 | 0 | 1 | 1 | 1 | 2 | 5.55  | 0.721 |
| 2 | 0 | 0 | 0 | 0 | 2 | 5.34  | 0.71  |
| 2 | 1 | 0 | 0 | 1 | 2 | 4.55  | 0.74  |
| 2 | 0 | 1 | 1 | 1 | 2 | 6.58  | 0.737 |
| 2 | 1 | 1 | 1 | 1 | 2 | 4.99  | 0.823 |
| 1 | 0 | 1 | 1 | 1 | 2 | 3.44  | 0.68  |
| 2 | 0 | 1 | 1 | 1 | 2 | 5.16  | 0.731 |
| 2 | 1 | 0 | 0 | 1 | 2 | 4.52  | 0.642 |
| 2 | 0 | 0 | 0 | 0 | 2 | 3.85  | 0.665 |
| 2 | 1 | 1 | 1 | 1 | 2 | 7.98  | 0.655 |

|   |   |   |   |   |   |         |       |
|---|---|---|---|---|---|---------|-------|
| 1 | 0 | 0 | 0 | 2 | 0 | 2.98    | 0.616 |
| 1 | 0 | 0 | 0 | 2 | 1 | 4.29    | 0.78  |
| 2 | 0 | 0 | 0 | 2 | 0 | 6.13    | 0.748 |
| 2 | 1 | 1 | 0 | 2 | 2 | 14.88   | 0.955 |
| 2 | 0 | 0 | 0 | 2 | 1 | 5.62    | 0.819 |
| 1 | 0 | 1 | 1 | 2 | 1 | 4.09    | 0.757 |
| 2 | 1 | 0 | 0 | 2 | 0 | 4.03    | 0.711 |
| 2 | 1 | 0 | 0 | 2 | 2 | 12.11   | 0.63  |
| 2 | 0 | 1 | 0 | 2 | 1 | 5.79    | 0.717 |
| 1 | 0 | 0 | 0 | 2 | 1 | 6.28    | 0.777 |
| 2 | 0 | 1 | 1 | 2 | 2 | 5.89    | 0.637 |
| 1 | 0 | 0 | 0 | 2 | 1 | 4.58    | 0.691 |
| 2 | 0 | 1 | 1 | 2 | 1 | 9.99    | 0.63  |
| 1 | 0 | 0 | 0 | 2 | 1 | 3.91    | 0.657 |
| 2 | 0 | 0 | 0 | 2 | 2 | 5.94    | 0.64  |
| 1 | 0 | 1 | 1 | 2 | 2 | 5.07    | 0.587 |
| 2 | 0 | 0 | 0 | 2 | 2 | 4.26    | 0.52  |
| 2 | 0 | 0 | 0 | 2 | 2 | 2.77    | 0.417 |
| 2 | 0 | 0 | 0 | 2 | 2 | 3.36    | 0.565 |
| 2 | 1 | 0 | 0 | 2 | 1 | 10.39   | 0.955 |
| 2 | 0 | 1 | 1 | 2 | 0 | 9.96    | 0.597 |
| 2 | 1 | 1 | 0 | 2 | 1 | 4.95    | 0.721 |
| 2 | 1 | 0 | 0 | 2 | 1 | 4.45    | 0.586 |
| 2 | 1 | 1 | 1 | 2 | 1 | 7.98    | 0.655 |
| 2 | 0 | 1 | 0 | 3 | 1 | 10.52   | 0.597 |
| 2 | 1 | 1 | 0 | 3 | 2 | 9.17    | 0.721 |
| 2 | 1 | 0 | 0 | 3 | 2 | 4.34    | 0.586 |
| 1 | 1 | 1 | 1 | 3 | 1 | 4.44    | 0.657 |
| 2 | 1 | 1 | 1 | 3 | 1 | 5.98    | 0.693 |
| 2 | 0 | 0 | 0 | 3 | 2 | 3.05    | 0.648 |
| 2 | 1 | 1 | 1 | 3 | 2 | 6.40983 | 0.586 |

| L     | absoulte N | NLR         | NLR_G | response | start_time | end_time  | PFS_status |
|-------|------------|-------------|-------|----------|------------|-----------|------------|
| 0.188 | 3.1365     | 3.925531915 | 2     | 3        | 19-Jan-20  | 13-Oct-20 | 1          |
| 0.139 | 4.75       | 5.467625899 | 2     | 2        | 26-Jul-19  | 1-Mar-20  | 1          |
| 0.244 | 1.378      | 2.663934426 | 1     | 2        | 31-Mar-20  | 31-Dec-20 | 0          |
| 0.169 | 5.8474     | 4           | 2     | 4        | 5-Sep-19   | 22-Nov-19 | 1          |
| 0.106 | 7.79328    | 7.471698113 | 2     | 2        | 14-Sep-19  | 26-Dec-19 | 1          |
| 0.301 | 3.16854    | 2.016611296 | 1     | 2        | 19-Dec-19  | 6-Jul-20  | 1          |
| 0.232 | 2.6866     | 2.86637931  | 1     | 2        | 14-Jan-18  | 30-Oct-18 | 1          |
| 0.395 | 2.70319    | 1.293670886 | 1     | 2        | 23-Mar-18  | 10-Mar-20 | 1          |
| 0.208 | 3.65568    | 3.230769231 | 2     | 3        | 17-Mar-18  | 1-Sep-18  | 1          |
| 0.197 | 3.95368    | 3.436548223 | 2     | 2        | 5-Jun-18   | 24-Aug-18 | 1          |
| 0.28  | 3.1824     | 2.228571429 | 1     | 3        | 15-May-19  | 23-Apr-20 | 1          |
| 0.417 | 0.99169    | 1.095923261 | 1     | 4        | 4-Jun-19   | 16-Jul-19 | 1          |
| 0.309 | 3.3152     | 1.915857605 | 1     | 2        | 25-Jun-19  | 10-Mar-20 | 1          |
| 0.212 | 6.99696    | 3.245283019 | 2     | 2        | 12-Jul-19  | 15-Mar-20 | 1          |
| 0.264 | 3.424      | 2.424242424 | 1     | 3        | 3-Jul-19   | 1-Feb-20  | 1          |
| 0.186 | 3.68836    | 3.720430108 | 2     | 2        | 23-Sep-19  | 1-Apr-20  | 1          |
| 0.254 | 3.30854    | 2.476377953 | 1     | 3        | 25-Oct-19  | 6-Mar-20  | 1          |
| 0.118 | 8.09532    | 6.745762712 | 2     | 4        | 24-Oct-19  | 10-Dec-19 | 1          |
| 0.222 | 4.57033    | 3.211711712 | 2     | 2        | 16-May-19  | 13-Dec-20 | 0          |
| 0.177 | 5.04258    | 4.146892655 | 2     | 2        | 18-Dec-19  | 22-Apr-20 | 1          |
| 0.282 | 3.35797    | 2.209219858 | 1     | 2        | 18-Mar-20  | 31-Dec-20 | 0          |
| 0.171 | 3.84705    | 4.368421053 | 2     | 4        | 23-Jul-20  | 18-Sep-20 | 1          |
| 0.2   | 2.86208    | 3.44        | 2     | 3        | 9-Mar-19   | 1-Jun-19  | 0          |
| 0.465 | 1.96511    | 0.901075269 | 1     | 3        | 22-Nov-18  | 2-Jul-19  | 1          |
| 0.232 | 3.93015    | 2.86637931  | 1     | 2        | 24-Dec-17  | 11-Oct-18 | 1          |
| 0.207 | 4.84352    | 3.323671498 | 2     | 4        | 7-Sep-17   | 23-Nov-17 | 1          |
| 0.205 | 4.2602     | 3.492682927 | 2     | 2        | 14-Dec-17  | 2-Apr-18  | 1          |
| 0.254 | 2.66845    | 2.531496063 | 1     | 4        | 29-Jun-16  | 15-Jul-16 | 1          |
| 0.131 | 2.6565     | 5.877862595 | 2     | 3        | 31-Dec-16  | 5-Jun-17  | 1          |
| 0.259 | 2.56885    | 2.38996139  | 1     | 3        | 8-Nov-18   | 24-Oct-19 | 1          |
| 0.251 | 2.95488    | 2.581673307 | 1     | 3        | 13-Jan-18  | 28-Jul-18 | 1          |
| 0.265 | 2.17977    | 2.426415094 | 1     | 2        | 4-Jun-18   | 9-May-19  | 1          |
| 0.094 | 5.71021    | 9.053191489 | 2     | 3        | 17-Sep-18  | 18-Jan-19 | 1          |
| 0.525 | 1.96282    | 0.744761905 | 1     | 2        | 9-Nov-18   | 1-Apr-19  | 1          |
| 0.239 | 2.76612    | 2.606694561 | 1     | 2        | 16-Jul-19  | 1-Mar-20  | 1          |
| 0.347 | 2.3744     | 1.291066282 | 1     | 3        | 12-Aug-20  | 9-Dec-20  | 1          |
| 0.233 | 4.21724    | 2.527896996 | 1     | 2        | 18-Jul-20  | 31-Dec-20 | 0          |
| 0.189 | 5.769632   | 3.75026455  | 2     | 3        | 25-Aug-20  | 31-Dec-20 | 0          |
| 0.164 | 4.8678     | 4.463414634 | 2     | 3        | 24-Jul-20  | 5-Nov-20  | 1          |
| 0.226 | 5.36462    | 3.07079646  | 2     | 4        | 7-Aug-20   | 20-Sep-20 | 1          |
| 0.374 | 1.79208    | 1.219251337 | 1     | 3        | 16-Oct-20  | 31-Dec-20 | 0          |
| 0.232 | 6.3126     | 2.879310345 | 1     | 2        | 28-May-20  | 31-Dec-20 | 0          |
| 0.202 | 3.22368    | 3.643564356 | 2     | 3        | 23-Apr-20  | 31-Dec-20 | 0          |
| 0.244 | 2.72835    | 2.643442623 | 1     | 3        | 15-Sep-20  | 31-Dec-20 | 0          |
| 0.211 | 4.7783     | 3.18957346  | 2     | 2        | 11-Jun-20  | 3-Dec-20  | 0          |
| 0.356 | 3.735      | 2.331460674 | 1     | 3        | 31-Aug-20  | 30-Nov-20 | 1          |
| 0.319 | 3.80656    | 1.855799373 | 1     | 3        | 10-Aug-19  | 17-Nov-20 | 1          |
| 0.156 | 3.6556     | 4.506410256 | 2     | 3        | 24-Sep-20  | 31-Dec-20 | 1          |
| 0.46  | 1.40128    | 1.008695652 | 1     | 3        | 22-Jan-20  | 31-Dec-20 | 0          |
| 0.247 | 6.34959    | 2.441295547 | 1     | 2        | 29-Dec-19  | 31-Dec-20 | 0          |
| 0.232 | 3.93015    | 2.86637931  | 1     | 2        | 24-Dec-17  | 25-Oct-18 | 1          |
| 0.243 | 2.88828    | 2.62962963  | 1     | 3        | 23-Sep-15  | 12-Dec-20 | 1          |

|       |          |             |   |   |           |                  |   |
|-------|----------|-------------|---|---|-----------|------------------|---|
| 0.098 | 5.53035  | 8.214285714 | 2 | 2 | 18-Dec-19 | 7-Mar-20         | 1 |
| 0.405 | 1.94947  | 1.256790123 | 1 | 2 | 4-Dec-18  | 3-Sep-19         | 1 |
| 0.039 | 5.319    | 23.07692308 | 2 | 2 | 24-Dec-17 | 22-Nov-18        | 1 |
| 0.205 | 4.26615  | 3.497560976 | 2 | 2 | 14-Dec-17 | 2-Apr-18         | 1 |
| 0.298 | 3.83141  | 1.916107383 | 1 | 3 | 17-Sep-18 | 29-Mar-19        | 1 |
| 0.319 | 3.80656  | 1.855799373 | 1 | 3 | 10-Aug-19 | 20-Oct-20        | 1 |
| 0.232 | 3.93015  | 2.86637931  | 1 | 2 | 24-Dec-17 | 25-Oct-18        | 1 |
| 0.243 | 2.88828  | 2.62962963  | 1 | 3 | 23-Sep-15 | 12-Dec-20        | 1 |
| 0.098 | 5.53035  | 8.214285714 | 2 | 2 | 18-Dec-19 | 7-Mar-20         | 1 |
| 0.405 | 1.94947  | 1.256790123 | 1 | 2 | 4-Dec-18  | 3-Sep-19         | 1 |
| 0.039 | 5.319    | 23.07692308 | 2 | 2 | 24-Dec-17 | 22-Nov-18        | 1 |
| 0.205 | 4.26615  | 3.497560976 | 2 | 2 | 14-Dec-17 | 2-Apr-18         | 1 |
| 0.298 | 3.83141  | 1.916107383 | 1 | 3 | 17-Sep-18 | 29-Mar-19        | 1 |
| 0.319 | 3.80656  | 1.855799373 | 1 | 3 | 10-Aug-19 | 20-Oct-20        | 1 |
| 0.276 | 2.67729  | 2.27173913  | 1 | 3 | 28-Feb-18 | 6-Sep-18         | 1 |
| 0.091 | 11.31624 | 8.857142857 | 2 | 3 | 14-Jul-17 | 7-Sep-17         | 1 |
| 0.183 | 3.50519  | 4.191256831 | 2 | 4 | 29-Jul-18 | 26-Oct-18        | 1 |
| 0.137 | 4.60278  | 5.97810219  | 2 | 3 | 23-Aug-18 | 11-Dec-18        | 1 |
| 0.164 | 2.98494  | 4.396341463 | 2 | 4 | 25-Jul-18 | 12-Sep-18        | 1 |
| 0.227 | 5.2269   | 2.885462555 | 1 | 2 | 19-Oct-18 | 24-Apr-19        | 1 |
| 0.188 | 2.17857  | 3.824468085 | 2 | 3 | 11-Apr-19 | 5-Sep-20         | 1 |
| 0.032 | 3.82044  | 29.625      | 2 | 4 | 15-Nov-18 | 15-Jan-19        | 1 |
| 0.253 | 2.41423  | 2.517786561 | 1 | 3 | 6-Feb-20  | 4-Dec-20         | 1 |
| 0.209 | 3.51379  | 3.38277512  | 2 | 3 | 31-Jan-19 | 2-Apr-19         | 1 |
| 0.3   | 3.456    | 2           | 1 | 3 | 17-Jul-19 | 11-Nov-19        | 1 |
| 0.111 | 4.0443   | 7.144144144 | 2 | 2 | 22-Dec-18 | 25-Apr-19        | 1 |
| 0.245 | 3.63916  | 2.342857143 | 1 | 3 | 26-Oct-19 | 1-Feb-20         | 1 |
| 0.38  | 1.34688  | 1.284210526 | 1 | 3 | 30-Dec-18 | 21-Aug-19        | 1 |
| 0.212 | 3.22848  | 3.226415094 | 2 | 4 | 21-Jul-19 | 19-Sep-19        | 1 |
| 0.347 | 2.9574   | 1.608069164 | 1 | 2 | 17-Jun-20 | 31-Dec-20        | 0 |
| 0.292 | 2.002    | 2.109589041 | 1 | 3 | 29-May-20 | 7-Dec-20         | 0 |
| 0.519 | 1.17312  | 0.724470135 | 1 | 3 | 9-Nov-19  | 14-Feb-20        | 1 |
| 0.181 | 3.71712  | 3.889502762 | 2 | 3 | 8-Nov-19  | 1-Apr-20         | 1 |
| 0.157 | 3.05148  | 4.50955414  | 2 | 2 | 16-Aug-19 | <b>12-Feb-20</b> | 1 |
| 0.21  | 4.0267   | 3.19047619  | 2 | 3 | 13-Mar-19 | 3-Oct-19         | 1 |
| 0.215 | 3.564    | 3.069767442 | 2 | 3 | 28-Dec-19 | 1-Mar-20         | 1 |
| 0.427 | 1.79896  | 1.058548009 | 1 | 3 | 26-Sep-19 | 13-Jan-20        | 1 |
| 0.071 | 4.194    | 12.67605634 | 2 | 3 | 24-Apr-20 | 15-Sep-20        | 1 |
| 0.416 | 1.72608  | 1.192307692 | 1 | 4 | 7-Dec-18  | 18-Jan-19        | 1 |
| 0.181 | 4.65647  | 4.038674033 | 2 | 4 | 27-May-16 | 25-Jun-16        | 1 |
| 0.17  | 7.6824   | 4.235294118 | 2 | 4 | 6-Nov-18  | 7-Dec-18         | 1 |
| 0.244 | 5.58688  | 3.62295082  | 1 | 4 | 28-Apr-16 | 5-May-16         | 1 |
| 0.388 | 1.34688  | 1.257731959 | 1 | 3 | 30-Dec-18 | 4-Jul-19         | 1 |
| 0.113 | 3.70944  | 6.513274336 | 2 | 3 | 23-Oct-17 | 12-Dec-17        | 1 |
| 0.15  | 4.00155  | 4.806666667 | 2 | 4 | 4-Jan-19  | 1-Mar-19         | 1 |
| 0.137 | 3.7914   | 5.182481752 | 2 | 4 | 1-Jul-17  | 19-Jul-17        | 1 |
| 0.198 | 3.367    | 3.737373737 | 2 | 3 | 6-Dec-17  | 26-Jan-18        | 1 |
| 0.169 | 4.84946  | 4.360946746 | 2 | 3 | 20-Nov-15 | 18-Aug-16        | 1 |
| 0.058 | 4.10677  | 14.18965517 | 2 | 3 | 2-Dec-15  | 1-Mar-16         | 1 |
| 0.218 | 2.3392   | 3.119266055 | 2 | 3 | 23-Jul-18 | 1-Dec-18         | 1 |
| 0.133 | 3.77196  | 5.496240602 | 2 | 3 | 9-Jan-18  | 9-May-18         | 1 |
| 0.232 | 2.90184  | 2.767241379 | 1 | 3 | 23-Sep-15 | 31-Dec-20        | 0 |
| 0.262 | 2.56025  | 2.538167939 | 1 | 4 | 28-Aug-16 | 21-Oct-16        | 1 |
| 0.227 | 5.2269   | 2.885462555 | 1 | 2 | 19-Oct-18 | 26-Aug-19        | 1 |



|       |           |             |   |   |           |           |   |
|-------|-----------|-------------|---|---|-----------|-----------|---|
| 0.273 | 1.83568   | 2.256410256 | 1 | 3 | 30-Sep-18 | 5-Aug-19  | 1 |
| 0.114 | 3.3462    | 6.842105263 | 2 | 3 | 20-Jun-17 | 18-Oct-17 | 1 |
| 0.159 | 4.58524   | 4.704402516 | 2 | 3 | 20-Jul-17 | 27-Feb-18 | 1 |
| 0.012 | 14.2104   | 79.58333333 | 2 | 4 | 4-Jul-17  | 4-Nov-17  | 1 |
| 0.137 | 4.60278   | 5.97810219  | 2 | 3 | 23-Aug-18 | 1-Nov-18  | 1 |
| 0.057 | 3.09613   | 13.28070175 | 2 | 3 | 4-Nov-18  | 1-Mar-19  | 1 |
| 0.223 | 2.86533   | 3.188340807 | 2 | 3 | 27-Oct-18 | 15-Jan-19 | 1 |
| 0.251 | 7.6293    | 2.509960159 | 1 | 3 | 15-Mar-19 | 15-Jul-19 | 1 |
| 0.193 | 4.15143   | 3.715025907 | 2 | 3 | 11-Jan-19 | 18-Apr-19 | 1 |
| 0.153 | 4.87956   | 5.078431373 | 2 | 2 | 13-Feb-20 | 23-Dec-20 | 0 |
| 0.202 | 3.75193   | 3.153465347 | 2 | 3 | 6-Jan-20  | 31-Dec-20 | 0 |
| 0.175 | 3.16478   | 3.948571429 | 2 | 1 | 15-Nov-19 | 11-Nov-20 | 1 |
| 0.258 | 6.2937    | 2.441860465 | 1 | 3 | 15-Aug-20 | 2-Nov-20  | 1 |
| 0.225 | 2.56887   | 2.92        | 1 | 4 | 14-Aug-19 | 12-Oct-19 | 1 |
| 0.224 | 3.8016    | 2.857142857 | 1 | 3 | 8-Feb-20  | 6-Apr-20  | 1 |
| 0.302 | 2.97609   | 1.943708609 | 1 | 3 | 1-Jun-20  | 11-Sep-20 | 1 |
| 0.25  | 2.2152    | 2.08        | 1 | 2 | 29-Jun-20 | 31-Dec-20 | 0 |
| 0.371 | 1.15509   | 1.123989218 | 1 | 2 | 28-Dec-19 | 28-Jul-20 | 1 |
| 0.277 | 1.8984    | 2.039711191 | 1 | 3 | 6-Mar-20  | 14-Oct-20 | 1 |
| 0.039 | 9.92245   | 24.48717949 | 2 | 3 | 22-Apr-20 | 4-Jul-20  | 1 |
| 0.289 | 5.94612   | 2.065743945 | 1 | 1 | 14-Jul-17 | 29-Jan-19 | 1 |
| 0.164 | 3.56895   | 4.396341463 | 2 | 3 | 25-Jul-18 | 12-Nov-18 | 1 |
| 0.337 | 2.6077    | 1.738872404 | 1 | 3 | 8-Mar-16  | 26-May-16 | 1 |
| 0.227 | 5.2269    | 2.885462555 | 1 | 2 | 19-Oct-18 | 26-Aug-19 | 1 |
| 0.289 | 6.28044   | 2.065743945 | 1 | 4 | 20-Feb-19 | 1-Apr-19  | 1 |
| 0.164 | 6.61157   | 4.396341463 | 2 | 3 | 14-Sep-18 | 1-Jan-19  | 1 |
| 0.337 | 2.54324   | 1.738872404 | 1 | 4 | 7-Jun-16  | 25-Jun-20 | 1 |
| 0.214 | 2.91708   | 3.070093458 | 2 | 1 | 21-Nov-18 | 30-Mar-20 | 1 |
| 0.191 | 4.14414   | 3.628272251 | 2 | 3 | 8-Apr-16  | 8-Jun-16  | 1 |
| 0.233 | 1.9764    | 2.78111588  | 1 | 4 | 21-Aug-19 | 7-Jan-20  | 1 |
| 0.31  | 3.7561602 | 1.890322581 | 1 | 2 | 24-Apr-19 | 26-Aug-19 | 1 |

| PFS  | PFS_duration | death_time | OS_STATUS | OS   | S_duration |
|------|--------------|------------|-----------|------|------------|
| 268  | 9.6          | 30-Dec-20  | 1         | 621  | 22.2       |
| 219  | 7.8          | 1-Jun-20   | 1         | 311  | 11.1       |
| 275  | 9.8          | 31-Dec-20  | 0         | 519  | 18.5       |
| 78   | 2.8          | 1-Mar-20   | 1         | 178  | 6.4        |
| 103  | 3.7          | 1-Sep-20   | 1         | 353  | 12.6       |
| 200  | 7.1          | 31-Dec-20  | 0         | 378  | 13.5       |
| 289  | 10.3         | 22-Nov-18  | 1         | 312  | 11.1       |
| 718  | 25.6         | 31-Dec-20  | 0         | 1014 | 36.2       |
| 168  | 6.0          | 12-Feb-19  | 1         | 332  | 11.9       |
| 80   | 2.9          | 4-Mar-19   | 1         | 272  | 9.7        |
| 344  | 12.3         | 31-Dec-19  | 1         | 230  | 8.2        |
| 42   | 1.5          | 1-Sep-19   | 1         | 89   | 3.2        |
| 259  | 9.3          | 1-Jun-20   | 1         | 342  | 12.2       |
| 247  | 8.8          | 1-Oct-20   | 1         | 447  | 16.0       |
| 213  | 7.6          | 1-May-20   | 1         | 303  | 10.8       |
| 191  | 6.8          | 31-Dec-20  | 0         | 465  | 16.6       |
| 133  | 4.8          | 31-Dec-20  | 0         | 433  | 15.5       |
| 47   | 1.7          | 16-Oct-20  | 1         | 358  | 12.8       |
| 577  | 20.6         | 31-Dec-20  | 1         | 595  | 21.3       |
| 126  | 4.5          | 1-Oct-20   | 1         | 288  | 10.3       |
| 288  | 10.3         | 31-Dec-20  | 0         | 288  | 10.3       |
| 57   | 2.0          | 18-Sep-20  | 1         | 57   | 2.0        |
| 84   | 3.0          | 1-Aug-20   | 1         | 511  | 18.3       |
| 222  | 7.9          | 2-Jul-19   | 1         | 222  | 7.9        |
| 291  | 10.4         | 1-Feb-19   | 1         | 404  | 14.4       |
| 77   | 2.8          | 1-Jan-18   | 1         | 116  | 4.1        |
| 109  | 3.9          | 18-May-18  | 1         | 155  | 5.5        |
| 16   | 0.6          | 31-Jul-16  | 1         | 32   | 1.1        |
| 156  | 5.6          | 28-Jul-17  | 1         | 209  | 7.5        |
| 350  | 12.5         | 31-Dec-20  | 1         | 784  | 28.0       |
| 196  | 7.0          | 30-Mar-19  | 1         | 441  | 15.8       |
| 339  | 12.1         | 1-Mar-20   | 1         | 636  | 22.7       |
| 123  | 4.4          | 1-Jun-20   | 1         | 623  | 22.3       |
| 143  | 5.1          | 1-Oct-19   | 1         | 326  | 11.6       |
| 229  | 8.2          | 1-Apr-20   | 1         | 260  | 9.3        |
| 119  | 4.3          | 31-Dec-20  | 0         | 141  | 5.0        |
| 166  | 5.9          | 31-Dec-20  | 1         | 166  | 5.9        |
| 128  | 4.6          | 1-Jan-21   | 0         | 129  | 4.6        |
| 104  | 3.7          | 31-Dec-20  | 1         | 160  | 5.7        |
| 44   | 1.6          | 1-Jan-21   | 1         | 147  | 5.3        |
| 76   | 2.7          | 31-Dec-20  | 0         | 76   | 2.7        |
| 217  | 7.8          | 1-Jan-21   | 0         | 218  | 7.8        |
| 252  | 9.0          | 2-Jan-21   | 0         | 254  | 9.1        |
| 107  | 3.8          | 3-Jan-21   | 0         | 110  | 3.9        |
| 175  | 6.3          | 31-Dec-20  | 0         | 203  | 7.3        |
| 91   | 3.3          | 7-Jan-21   | 1         | 129  | 4.6        |
| 465  | 16.6         | 1-Feb-21   | 1         | 541  | 19.3       |
| 98   | 3.5          | 1-Feb-21   | 1         | 130  | 4.6        |
| 344  | 12.3         | 31-Dec-20  | 0         | 344  | 12.3       |
| 368  | 13.1         | 31-Dec-20  | 0         | 368  | 13.1       |
| 305  | 10.9         | 1-Feb-19   | 1         | 404  | 14.4       |
| 1907 | 68.1         | 31-Dec-20  | 1         | 1926 | 68.8       |

|      |      |           |   |      |      |
|------|------|-----------|---|------|------|
| 80   | 2.9  | 1-Sep-20  | 1 | 258  | 9.2  |
| 273  | 9.8  | 31-Dec-20 | 0 | 758  | 27.1 |
| 333  | 11.9 | 23-Dec-18 | 1 | 364  | 13.0 |
| 109  | 3.9  | 14-May-18 | 1 | 151  | 5.4  |
| 193  | 6.9  | 1-Oct-19  | 1 | 379  | 13.5 |
| 437  | 15.6 | 31-Dec-20 | 0 | 509  | 18.2 |
| 305  | 10.9 | 1-Feb-19  | 1 | 404  | 14.4 |
| 1907 | 68.1 | 31-Dec-20 | 1 | 1926 | 68.8 |
| 80   | 2.9  | 1-Sep-20  | 1 | 258  | 9.2  |
| 273  | 9.8  | 31-Dec-20 | 0 | 758  | 27.1 |
| 333  | 11.9 | 23-Dec-18 | 1 | 364  | 13.0 |
| 109  | 3.9  | 14-May-18 | 1 | 151  | 5.4  |
| 193  | 6.9  | 1-Oct-19  | 1 | 379  | 13.5 |
| 437  | 15.6 | 31-Dec-20 | 0 | 509  | 18.2 |
| 190  | 6.8  | 1-Jan-19  | 1 | 307  | 11.0 |
| 55   | 2.0  | 17-Sep-17 | 1 | 65   | 2.3  |
| 89   | 3.2  | 1-Jan-19  | 1 | 156  | 5.6  |
| 110  | 3.9  | 1-Jan-19  | 1 | 131  | 4.7  |
| 49   | 1.8  | 1-Feb-19  | 1 | 191  | 6.8  |
| 187  | 6.7  | 1-Mar-20  | 1 | 499  | 17.8 |
| 513  | 18.3 | 21-Nov-19 | 1 | 224  | 8.0  |
| 61   | 2.2  | 15-Jan-19 | 1 | 61   | 2.2  |
| 302  | 10.8 | 31-Dec-20 | 1 | 329  | 11.8 |
| 61   | 2.2  | 2-May-19  | 1 | 91   | 3.3  |
| 117  | 4.2  | 20-Jan-20 | 1 | 187  | 6.7  |
| 124  | 4.4  | 1-Feb-20  | 1 | 406  | 14.5 |
| 98   | 3.5  | 1-Apr-20  | 1 | 158  | 5.6  |
| 234  | 8.4  | 15-Jun-20 | 1 | 533  | 19.0 |
| 60   | 2.1  | 1-Feb-20  | 1 | 195  | 7.0  |
| 197  | 7.0  | 31-Dec-20 | 0 | 197  | 7.0  |
| 192  | 6.9  | 31-Dec-20 | 0 | 216  | 7.7  |
| 97   | 3.5  | 1-May-20  | 1 | 174  | 6.2  |
| 145  | 5.2  | 1-May-20  | 1 | 175  | 6.3  |
| 180  | 6.4  | 1-Apr-20  | 1 | 229  | 8.2  |
| 204  | 7.3  | 1-Apr-20  | 1 | 385  | 13.8 |
| 64   | 2.3  | 1-Aug-20  | 1 | 217  | 7.8  |
| 109  | 3.9  | 1-Oct-20  | 1 | 371  | 13.3 |
| 144  | 5.1  | 1-Oct-20  | 1 | 160  | 5.7  |
| 42   | 1.5  | 18-Jan-19 | 1 | 42   | 1.5  |
| 29   | 1.0  | 26-Jun-16 | 1 | 30   | 1.1  |
| 31   | 1.1  | 31-Dec-18 | 1 | 55   | 2.0  |
| 7    | 0.3  | 16-Sep-16 | 1 | 141  | 5.0  |
| 186  | 6.6  | 15-Jun-20 | 1 | 533  | 19.0 |
| 50   | 1.8  | 1-Mar-18  | 1 | 129  | 4.6  |
| 56   | 2.0  | 1-May-19  | 1 | 117  | 4.2  |
| 18   | 0.6  | 1-Oct-17  | 1 | 92   | 3.3  |
| 51   | 1.8  | 26-Jan-18 | 1 | 51   | 1.8  |
| 272  | 9.7  | 1-Dec-16  | 1 | 377  | 13.5 |
| 90   | 3.2  | 11-Nov-16 | 1 | 345  | 12.3 |
| 131  | 4.7  | 1-Feb-19  | 1 | 193  | 6.9  |
| 120  | 4.3  | 1-Jul-18  | 1 | 173  | 6.2  |
| 1926 | 68.8 | 31-Dec-20 | 0 | 1926 | 68.8 |
| 54   | 1.9  | 21-Oct-17 | 1 | 419  | 15.0 |
| 311  | 11.1 | 1-Mar-20  | 1 | 499  | 17.8 |

|      |      |           |   |      |      |
|------|------|-----------|---|------|------|
| 309  | 11.0 | 1-Jul-19  | 1 | 274  | 9.8  |
| 120  | 4.3  | 1-Jan-18  | 1 | 195  | 7.0  |
| 222  | 7.9  | 31-Mar-18 | 1 | 254  | 9.1  |
| 123  | 4.4  | 15-Nov-17 | 1 | 134  | 4.8  |
| 70   | 2.5  | 1-Jan-19  | 1 | 131  | 4.7  |
| 117  | 4.2  | 1-May-19  | 1 | 178  | 6.4  |
| 80   | 2.9  | 15-Jan-19 | 1 | 80   | 2.9  |
| 122  | 4.4  | 15-Aug-19 | 1 | 153  | 5.5  |
| 97   | 3.5  | 1-May-19  | 1 | 110  | 3.9  |
| 314  | 11.2 | 31-Dec-20 | 0 | 322  | 11.5 |
| 360  | 12.9 | 31-Dec-20 | 0 | 360  | 12.9 |
| 362  | 12.9 | 31-Dec-20 | 0 | 412  | 14.7 |
| 79   | 2.8  | 31-Jan-21 | 1 | 169  | 6.0  |
| 59   | 2.1  | 1-Jan-20  | 1 | 140  | 5.0  |
| 58   | 2.1  | 1-Jul-20  | 1 | 144  | 5.1  |
| 102  | 3.6  | 1-Dec-20  | 1 | 183  | 6.5  |
| 185  | 6.6  | 31-Dec-20 | 1 | 185  | 6.6  |
| 213  | 7.6  | 1-Sep-20  | 1 | 248  | 8.9  |
| 222  | 7.9  | 31-Dec-20 | 0 | 300  | 10.7 |
| 73   | 2.6  | 1-Oct-20  | 1 | 162  | 5.8  |
| 564  | 20.1 | 1-Apr-19  | 1 | 626  | 22.4 |
| 110  | 3.9  | 1-Jan-19  | 1 | 160  | 5.7  |
| 79   | 2.8  | 25-Jun-20 | 1 | 1570 | 56.1 |
| 311  | 11.1 | 1-Mar-20  | 1 | 499  | 17.8 |
| 40   | 1.4  | 1-Apr-19  | 1 | 40   | 1.4  |
| 109  | 3.9  | 1-Jan-19  | 1 | 109  | 3.9  |
| 1479 | 52.8 | 25-Jun-20 | 1 | 1479 | 52.8 |
| 495  | 17.7 | 31-Dec-20 | 0 | 771  | 27.5 |
| 61   | 2.2  | 18-Jul-16 | 1 | 101  | 3.6  |
| 139  | 5.0  | 16-Jun-20 | 1 | 300  | 10.7 |
| 124  | 4.4  | 1-Mar-20  | 1 | 312  | 11.1 |
